# Supplementary material for: Ultrasensitive microfluidic solid-phase ELISA using an actuatable microwell-patterned PDMS chip
Source: Royal Society of Chemistry journal article supplement (doi:10.1039/c3lc50783a), 2013-01-01
Supplement: c3lc50783a.pdf [file c3lc50783a.pdf]

## Supporting Information

### Ultrasensitive Microfluidic Solid-Phase ELISA Using an Actuable Microwell-Patterned PDMS Chip

Tanyu Wang<sup>1,2</sup>, Mohan Zhang<sup>1</sup>, Dakota Dreher<sup>1</sup>, and Yong Zeng<sup>1,2,3,\*</sup>

1. Department of Chemistry, 2. Ralph N Adams Institute of Bioanalytical Chemistry, 3. Bioengineering Graduate Program, University of Kansas, Lawrence, KS 66045

\* Corresponding author.

Tel: (785) 864-8105; Fax: (785) 864-5396; E-mail: [yongz@ku.edu](mailto:yongz@ku.edu)

#### Supporting Figure S1.

##### A Pneumatic sealing on glass substrate

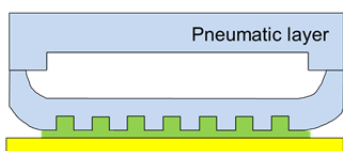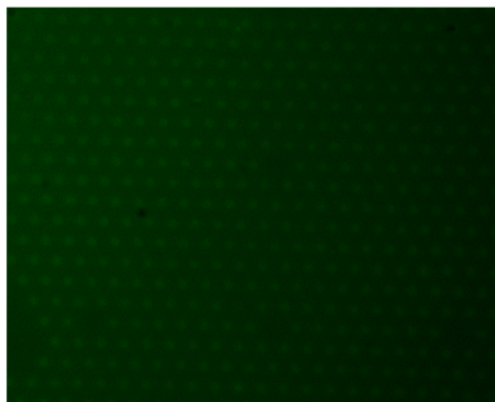

##### B Mechanical sealing on PDMS coated glass substrate

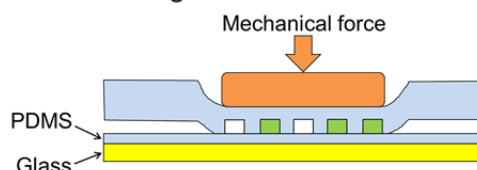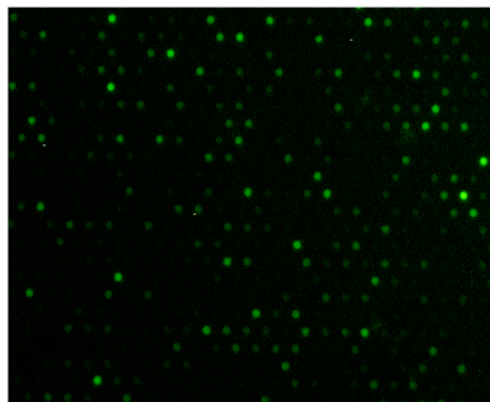

**Figure S1.** Chemifluorescence detection of  $\beta$ -galactosidase ( $\beta$ -gal) using the femtoliter microwell arrays (~83 fl). Here a final concentration of 1 ng/mL  $\beta$ -gal was used, which is equivalent to an effective concentration of 0.09 copies per well. (A) The PDMS chip was assembled directly onto a clean glass slide. The assembled device was first primed with 1% BSA to coat the channel surface for 30 mins. Then 2 ng/mL  $\beta$ -gal was mixed with 0.5 mM FDG substrate in PBS working buffer and injected into the assay chamber immediately. A relatively low pressure (60 kPa) was applied to press the microwell-patterned membrane against the glass surface. It was observed that all the wells became fluorescent after 20 min incubation. (B) The microwell-patterned PDMS chip was assembled onto a glass slide spin-coated with a thin layer of PDMS. The assay procedure was the same as in (A) except that the PDMS microwells were sealed tightly against the PDMS coated substrate by a strong mechanical force. In this case, digital counting of single  $\beta$ -gal molecules statistically partitioned into individual femtoliter wells was achieved at the same  $\beta$ -gal concentration as in (A). This comparison confirms the formation of a thin-layer of aqueous solution connecting the wells in the experiment of (A).

## Supporting Figure S2.

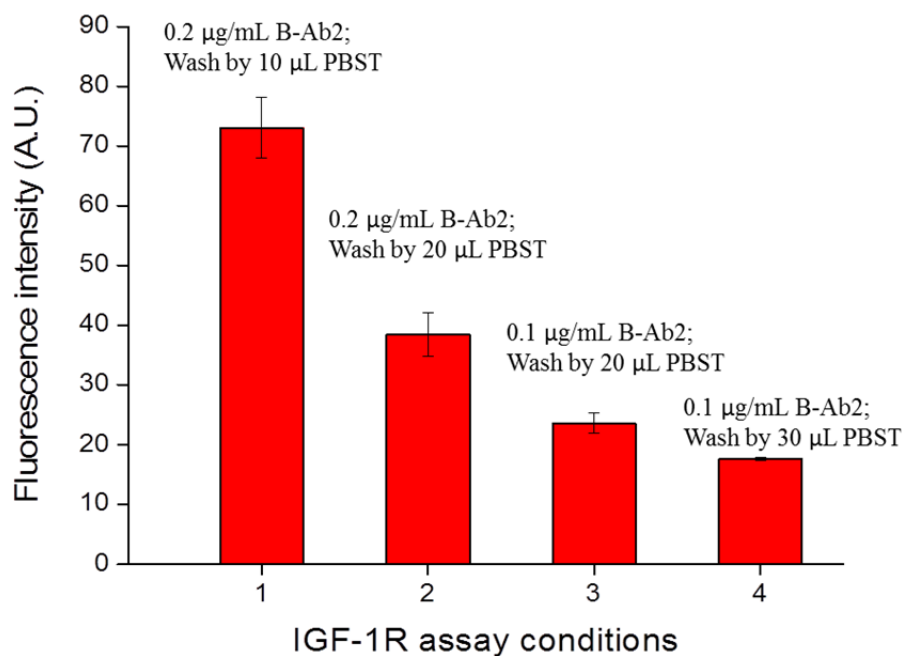

**Figure S2.** Effects of the concentration of biotinylated detection antibody (B-Ab2) and washing volume on the background for the microfluidic IGF-1R assay. The combination of 0.1 mg/mL B-Ab2 with 30 µL PBST washing yielded a dramatically reduced background level without excessively extending the assay time. Chemifluorescence detection conditions: [SβG] = 0.2 µg/mL, [FDG] = 0.5 mM, reaction time = 900 s and exposure time = 2.5 s. Error bars indicate standard deviations of fluorescence intensity in the microwells ( $n > 100$ ) in multiple images obtained in one experiment.

### Supporting Figure S3.

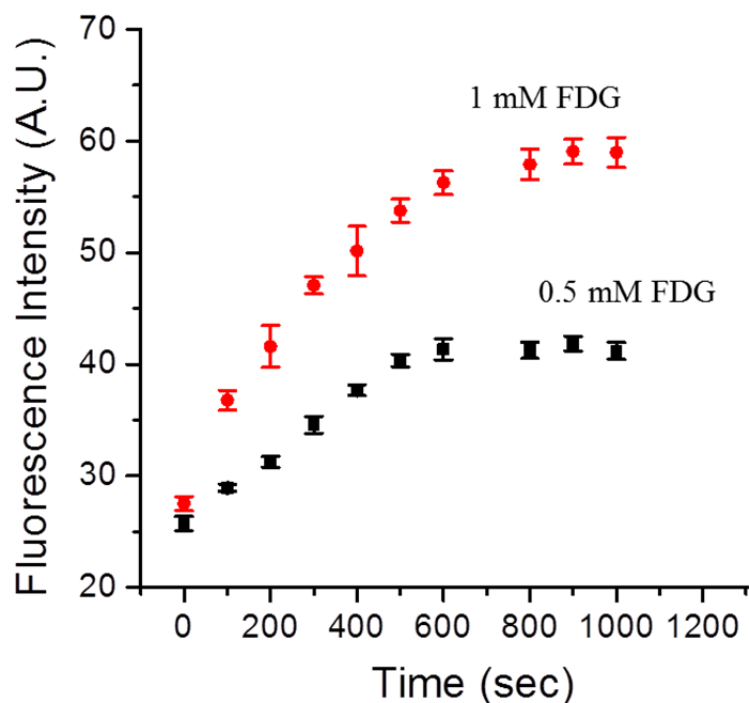

**Figure S3.** Time-lapse measurements of fluorescein products converted by  $\beta$ -gal captured by the sandwiched antibody-antigen complex on the surface at [FDG] of 0.5 and 1 mM. Chemifluorescence detection conditions: [IGF-1F] = 0.1 ng/mL, [S $\beta$ G] = 0.2  $\mu$ g/mL, exposure time = 2.5 s. Error bars indicate standard deviations of fluorescence intensity in the microwells ( $n > 100$ ) in multiple images obtained in one experiment.

**Table 1S.** Performance comparison between our microfluidic ELISA and the commercial ELISA kits for IGF-1R.

| Human IGF-1R Assay                       | Manufacturer           | LOD (pg/mL)         | Detection Range (pg/mL) | Sample Consumption | Detection Antibody Consumption | Total Incubation Time <sup>d</sup> |
|------------------------------------------|------------------------|---------------------|-------------------------|--------------------|--------------------------------|------------------------------------|
| <b>Microfluidic ELISA</b>                | present work           | 0.0035 <sup>b</sup> | 0.01 - 1000             | 10 $\mu$ L         | 10 $\mu$ L                     | 0.75 h                             |
|                                          | Uscn Life Science Inc. | 105 <sup>c</sup>    | 312 - 20000             | 100 $\mu$ L        | 100 $\mu$ L                    | 3.5 h                              |
| <b>Commercial ELISA kits<sup>a</sup></b> | RayBio                 | 6                   | 8.23 - 6000             | 100 $\mu$ L        | 100 $\mu$ L                    | 4.25 h                             |
|                                          | abcam                  | 6                   | 8.23 - 6000             | 100 $\mu$ L        | 100 $\mu$ L                    | 4.25 h                             |
|                                          | Millipore              | 160                 | 160 - 10000             | 100 $\mu$ L        | 100 $\mu$ L                    | 3 h                                |
|                                          | Assaybiotech           | 250                 | 250 - 16000             | 100 $\mu$ L        | 100 $\mu$ L                    | 4.5 h                              |
|                                          | Abnova                 | 250                 | 250 - 16000             | 100 $\mu$ L        | 100 $\mu$ L                    | 4.5 h                              |

<sup>a</sup> Detection is based on absorption measurement using HRP/TMB

<sup>b</sup> LOD is calculated from the value of blank signal plus three standard deviations.

<sup>c</sup> LOD is calculated from the value of blank signal plus three standard deviations.

<sup>d</sup> Total incubation time excludes the time for immobilization of capture antibody and washing steps.
